# Supplementary material for: Trends in avoidable hospitalizations in a developed City in eastern China: 2015 to 2018
Source: Springer Nature journal article supplement (doi:10.1186/s12913-022-08275-w), 2022-07-04
Supplement: MOESM1 [file 23236978]

**Appendix 1. Diagnosis code for an avoidable hospital admission for asthma, COPD, CHF, hypertension and diabetes (OECD Health Care Quality Indicators 2018-19)**

Indicators in the Avoidable admission indicator set include:

1. Asthma hospital admission
2. Chronic obstructive pulmonary disease (COPD) hospital admission
3. Congestive heart failure (CHF) hospital admission
4. Hypertension hospital admission
5. Diabetes hospital admission

**AA1) ASTHMA HOSPITAL ADMISSION**

(See Glossary for definitions of italicized terminology)

**Coverage:** Population aged 15 and older (5 year age groups). All *acute care hospitals*, including public and private hospitals that provide inpatient care.

**Numerator:** All non-maternal/non-neonatal hospital *admissions* with a *principal diagnosis* code of asthma (see Asthma diagnosis codes below) in a specified year.

**Exclude:**

- Cases where the patient died in hospital during the admission.
- Cases resulting from a transfer from another acute care institution (*transfers-in*).
- Cases with *MDC 14* or specified pregnancy, childbirth, and puerperium codes in any field – Refer to Annex D (Excel sheet - HCQO 2018\_19 Data Collection\_Annex A-I)
- Cases with cystic fibrosis and anomalies of the respiratory system diagnosis code in any field (see ICD codes below)
- Cases that are *same day/day only admissions*

**Denominator:** Population count.

**Asthma diagnosis codes:**

| ICD-9-CM                        | ICD-10-WHO                         |
|---------------------------------|------------------------------------|
| 49300 EXTRINSIC ASTHMA NOS      | J450 PREDOMINANTLY ALLERGIC ASTHMA |
| 49301 EXT ASTHMA W STATUS ASH   | J451 NONALLERGIC ASTHMA            |
| 49302 EXT ASTHMA W ACUTE EXAC   | J458 MIXED ASTHMA                  |
| 49310 INT ASTHMA W/O STAT ASTH  | J459 ASTHMA, UNSPECIFIED           |
| 49311 INTRINSIC ASTHMA NOS      | J46 STATUS ASTHMATICUS             |
| 49312 INT ASTHMA W ACUTE EXAC   |                                    |
| 49320 CH OB ASTH NOS            |                                    |
| 49321 CH OB ASTHMA W STAT ASTH  |                                    |
| 49322 CH OBS ASTH W ACUTE EXAC  |                                    |
| 49381 EXERCISE IND BRONCHOSPASM |                                    |
| 49382 COUGH VARIANT ASTHMA      |                                    |
| 49390 ASTHMA NOS                |                                    |
| 49391 ASTHMA W STATUS ASTHMAT   |                                    |
| 49392 ASTHMA W ACUTE EXAC       |                                    |

**Exclude diagnosis codes cystic fibrosis and anomalies of the respiratory system:**

| ICD-9-CM                                                                                                                                                                                                                                                                                                                                                                                                                                                                                                                                                                                                                                                                                                                                 | ICD-10-WHO                                                                                                                                                                                                                                                                                                                                                                                                                                                                                                                                                                                                                                                                                                                                                                                                                                                                                                                                                                                                                                                                                                                                                                                                                                                                                                                                                                                                                                                                                                                                                                                                                                                                                                                                                                                                                                                                                                                                                                                                                                                                                                                                                                                                                                                                                                                                                                                 |
|------------------------------------------------------------------------------------------------------------------------------------------------------------------------------------------------------------------------------------------------------------------------------------------------------------------------------------------------------------------------------------------------------------------------------------------------------------------------------------------------------------------------------------------------------------------------------------------------------------------------------------------------------------------------------------------------------------------------------------------|--------------------------------------------------------------------------------------------------------------------------------------------------------------------------------------------------------------------------------------------------------------------------------------------------------------------------------------------------------------------------------------------------------------------------------------------------------------------------------------------------------------------------------------------------------------------------------------------------------------------------------------------------------------------------------------------------------------------------------------------------------------------------------------------------------------------------------------------------------------------------------------------------------------------------------------------------------------------------------------------------------------------------------------------------------------------------------------------------------------------------------------------------------------------------------------------------------------------------------------------------------------------------------------------------------------------------------------------------------------------------------------------------------------------------------------------------------------------------------------------------------------------------------------------------------------------------------------------------------------------------------------------------------------------------------------------------------------------------------------------------------------------------------------------------------------------------------------------------------------------------------------------------------------------------------------------------------------------------------------------------------------------------------------------------------------------------------------------------------------------------------------------------------------------------------------------------------------------------------------------------------------------------------------------------------------------------------------------------------------------------------------------|
| <p>27700 CYSTIC FIBROS W/O ILEUS<br/>           27701 CYSTIC FIBROS W ILEUS<br/>           27702 CYSTIC FIBROS W PUL MAN<br/>           27703 CYSTIC FIBROSIS W GI MAN<br/>           27709 CYSTIC FIBROSIS NEC<br/>           74721 ANOMALIES OF AORTIC ARCH<br/>           7483 LARYNGOTRACH ANOMALY NEC<br/>           7484 CONGENITAL CYSTIC LUNG<br/>           7485 AGENESIS OF LUNG<br/>           74860 LUNG ANOMALY NOS<br/>           74861 CONGEN BRONCHIECTASIS<br/>           74869 LUNG ANOMALY NEC<br/>           7488 RESPIRATORY ANOMALY NEC<br/>           7489 RESPIRATORY ANOMALY NOS<br/>           7503 CONG ESOPH FISTULA/ATRES<br/>           7593 SITUS INVERSUS<br/>           7707 PERINATAL CHR RESP DIS</p> | <p>E840 CYSTIC FIBROSIS WITH PULMONARY MANIFESTATIONS<br/>           E841 CYSTIC FIBROSIS WITH INTESTINAL MANIFESTATIONS<br/>           E848 CYSTIC FIBROSIS WITH OTHER MANIFESTATIONS<br/>           E849 CYSTIC FIBROSIS, UNSPECIFIED<br/>           P27.0 WILSON-MIKITY SYNDROME<br/>           P27.1 BRONCHOPULMONARY DYSPLASIA ORIGINATING IN THE PERINATAL PERIOD<br/>           P27.8 OTHER CHRONIC RESPIRATORY DISEASES ORIGINATING IN THE PERINATAL PERIOD<br/>           P27.9 UNSPECIFIED CHRONIC RESP DISEASE ORIGINATING IN THE PERINATAL PERIOD<br/>           Q25.4 OTHER CONGENITAL MALFORMATIONS OF AORTA<br/>           Q31.1 CONGENITAL SUBGLOTTIC STENOSIS<br/>           Q31.2 LARYNGEAL HYPOPLASIA<br/>           Q31.3 LARYNGOCELE<br/>           Q31.5 CONGENITAL LARYNGOMALACIA<br/>           Q31.8 OTHER CONGENITAL MALFORMATIONS OF LARYNX<br/>           Q31.9 CONGENITAL MALFORMATION OF LARYNX, UNSPECIFIED<br/>           Q32.0 CONGENITAL TRACHEOMALACIA<br/>           Q32.1 OTHER CONGENITAL MALFORMATIONS OF TRACHEA<br/>           Q32.2 CONGENITAL BRONCHOMALACIA<br/>           Q32.3 CONGENITAL STENOSIS OF BRONCHUS<br/>           Q32.4 OTHER CONGENITAL MALFORMATIONS OF BRONCHUS<br/>           Q33.0 CONGENITAL CYSTIC LUNG<br/>           Q33.1 ACCESSORY LOBE OF LUNG<br/>           Q33.2 SEQUESTRATION OF LUNG<br/>           Q33.3 AGENESIS OF LUNG<br/>           Q33.4 CONGENITAL BRONCHIECTASIS<br/>           Q33.5 ECTOPIC TISSUE IN LUNG<br/>           Q33.6 HYPOPLASIA AND DYSPLASIA OF LUNG<br/>           Q33.8 OTHER CONGENITAL MALFORMATIONS OF LUNG<br/>           Q33.9 CONGENITAL MALFORMATION OF LUNG, UNSPECIFIED<br/>           Q34.0 ANOMALY OF PLEURA<br/>           Q34.1 CONGENITAL CYST OF MEDIASTINUM<br/>           Q34.8 OTHER SPECIFIED CONGENITAL MALFORMATIONS OF RESPIRATORY SYSTEM<br/>           Q34.9 CONGENITAL MALFORMATION OF RESPIRATORY SYSTEM, UNSPECIFIED<br/>           Q39.0 ATRESIA OF OESOPHAGUS WITHOUT FISTULA<br/>           Q39.1 ATRESIA OF OESOPHAGUS WITH TRACHEO-OESOPHAGEAL FISTULA<br/>           Q39.2 CONGENITAL TRACHEO-OESOPHAGEAL FISTULA WITHOUT ATRESIA<br/>           Q39.3 CONGENITAL STENOSIS AND STRICTURE OF OESOPHAGUS<br/>           Q39.4 OESOPHAGEAL WEB<br/>           Q39.8 OTHER CONGENITAL MALFORMATIONS OF OESOPHAGUS<br/>           Q89.3 SITUS INVERSUS</p> |

## AA2) CHRONIC OBSTRUCTIVE PULMONARY DISEASE (COPD) HOSPITAL ADMISSION

(See Glossary for definitions of italicized terminology)

**Coverage:** Population aged 15 and older (5 year age groups). All *acute care hospitals*, including public and private hospitals that provide inpatient care.

**Numerator:** All non-maternal/non-neonatal hospital *admissions* with a *principal diagnosis* code of Chronic Obstructive Pulmonary Disease (See COPD diagnosis codes below) in a specified year.

**Exclude:**

- Cases where the patient died in hospital during the admission.
- Cases resulting from a transfer from another acute care institution (*transfers-in*).
- Cases with *MDC 14* or specified pregnancy, childbirth, and puerperium codes in any field – Refer to Annex D (Excel sheet - HCQO 2018\_19 Data Collection\_Annex A-I)
- Cases that are *same day/day only admissions*

**Denominator:** Population count.

### COPD diagnosis codes:

| ICD-9-CM                                                                                                                   | ICD-10-WHO                                                                   |
|----------------------------------------------------------------------------------------------------------------------------|------------------------------------------------------------------------------|
| 490 BRONCHITIS NOS*                                                                                                        | J40 BRONCHITIS*                                                              |
| 4660 AC BRONCHITIS*                                                                                                        | J410 SIMPLE CHRONIC BRONCHITIS                                               |
| 4910 SIMPLE CHR BRONCHITIS                                                                                                 | J411 MUCOPURULENT CHRONIC BRONCHITIS                                         |
| 4911 MUCOPURUL CHR BRONCHITIS                                                                                              | J418 MIXED SIMPLE AND MUCOPURULENT CHRONIC BRONCHITIS                        |
| 49120 OBS CHR BRNC W/O ACT EXA                                                                                             | J42 UNSPECIFIED CHRONIC BRONCHITIS                                           |
| 49121 OBS CHR BRNC W ACT EXA                                                                                               | J430 MACLEOD'S SYNDROME                                                      |
| 4918 CHRONIC BRONCHITIS NEC                                                                                                | J431 PANLOBULAR EMPHYSEMA                                                    |
| 4919 CHRONIC BRONCHITIS NOS                                                                                                | J432 CENTRILOBULAR EMPHYSEMA                                                 |
| 4920 EMPHYSEMATOUS BLEB                                                                                                    | J438 OTHER EMPHYSEMA                                                         |
| 4928 EMPHYSEMA NEC                                                                                                         | J439 EMPHYSEMA, UNSPECIFIED                                                  |
| 494 BRONCHIECTASIS                                                                                                         | J440 COPD WITH ACUTE LOWER RESPIRATORY INFECTION                             |
| 4940 BRONCHIECTAS W/O AC EXAC                                                                                              | J441 COPD WITH ACUTE EXACERBATION, UNSPECIFIED                               |
| 4941 BRONCHIECTASIS W AC EXAC                                                                                              | J448 OTHER SPECIFIED CHRONIC OBSTRUCTIVE PULMONARY DISEASE                   |
| 496 CHR AIRWAY OBSTRUCT NEC                                                                                                | J449 CHRONIC OBSTRUCTIVE PULMONARY DISEASE, UNSPECIFIED                      |
| * Qualifies only if accompanied by secondary diagnosis of 491.xx, 492.x, 494.x or 496 (i.e., any other code on this list). | J47 BRONCHIECTASIS                                                           |
|                                                                                                                            | * Qualifies only if accompanied by secondary diagnosis of J41, J43, J44, J47 |

### **AA3) CONGESTIVE HEART FAILURE (CHF) HOSPITAL ADMISSION**

(See Glossary for definitions of italicized terminology)

**Coverage:** Population aged 15 and older (5 year age groups). All *acute care hospitals*, including public and private hospitals that provide inpatient care.

**Numerator:** All non-maternal/non-neonatal hospital *admissions* with *principal diagnosis* code of Congestive Heart Failure (See CHF diagnosis codes below) in a specified year.

**Exclude:**

- Cases where the patient died in hospital during the admission.
- Cases resulting from a transfer from another acute care institution (*transfers-in*).
- Cases with cardiac procedure codes in any field – Refer to Annex A (Excel sheet - HCQO 2018\_19 Data Collection\_Annex A-I)
- Cases with *MDC 14* or specified pregnancy, childbirth, and puerperium codes in any field – Refer to Annex D (Excel sheet - HCQO 2018\_19 Data Collection\_Annex A-I)
- Cases that are *same day/day only admissions*

**Denominator:** Population count.

**CHF diagnosis codes:**

| ICD-9-CM                       | ICD-10-WHO                                                                                        |
|--------------------------------|---------------------------------------------------------------------------------------------------|
| 39891 RHEUMATIC HEART FAILURE  | I11.0 HYPERTENSIVE HEART DISEASE WITH (CONGESTIVE) HEART FAILURE                                  |
| 40201 MAL HYPERT HRT DIS W CHF | I13.0 HYPERTENSIVE HEART AND RENAL DISEASE WITH (CONGESTIVE) HEART FAILURE                        |
| 40211 BENIGN HYP HRT DIS W CHF | I13.2 HYPERTENSIVE HEART AND RENAL DISEASE WITH BOTH (CONGESTIVE) HEART FAILURE AND RENAL FAILURE |
| 40291 HYPERTEN HEART DIS W CHF | I50.0 CONGESTIVE HEART FAILURE                                                                    |
| 40401 MAL HYPER HRT/REN W CHF  | I50.1 LEFT VENTRICULAR FAILURE                                                                    |
| 40403 MAL HYP HRT/REN W CHF/RF | I50.9 HEART FAILURE, UNSPECIFIED                                                                  |
| 40411 BEN HYPER HRT/REN W CHF  |                                                                                                   |
| 40413 BEN HYP HRT/REN W CHF/RF |                                                                                                   |
| 40491 HYPER HRT/REN NOS W CHF  |                                                                                                   |
| 40493 HYP HT/REN NOS W CHF/RF  |                                                                                                   |
| 4280 CONGESTIVE HEART FAILURE  |                                                                                                   |
| 4281 LEFT HEART FAILURE        |                                                                                                   |
| 42820 SYSTOLIC HRT FAILURE NOS |                                                                                                   |
| 42821 AC SYSTOLIC HRT FAILURE  |                                                                                                   |
| 42822 CHR SYSTOLIC HRT FAILURE |                                                                                                   |
| 42823 AC ON CHR SYST HRT FAIL  |                                                                                                   |
| 42830 DIASTOLC HRT FAILURE NOS |                                                                                                   |
| 42831 AC DIASTOLIC HRT FAILURE |                                                                                                   |
| 42832 CHR DIASTOLIC HRT FAIL   |                                                                                                   |

|                                                                                                                                                                                                 |  |
|-------------------------------------------------------------------------------------------------------------------------------------------------------------------------------------------------|--|
| 42833 AC ON CHR DIAST HRT FAIL<br>42840 SYST/DIAST HRT FAIL NOS<br>42841 AC SYST/DIASTOL HRT FAIL<br>42842 CHR SYST/DIASTL HRT FAIL<br>42843 AC/CHR SYST/DIA HRT FAIL<br>4289 HEART FAILURE NOS |  |
|-------------------------------------------------------------------------------------------------------------------------------------------------------------------------------------------------|--|

**AA4) HYPERTENSION HOSPITAL ADMISSION***(See Glossary for definitions of italicized terminology)*

**Coverage:** Population aged 15 and older (5 year age groups). All *acute care hospitals*, including public and private hospitals that provide inpatient care.

**Numerator:** All non-maternal/non-neonatal hospital *admissions* with *principal diagnosis* code of Hypertension (see Hypertension diagnosis codes below) in a specified year.

**Exclude:**

- Cases where the patient died in hospital during the admission.
- Cases resulting from a transfer from another acute care institution (*transfers-in*).
- Cases with cardiac procedure codes in any field – Refer to Annex A (Excel sheet - HCQO 2018\_19 Data Collection\_Annex A-I)
- Cases with *MDC 14* or specified pregnancy, childbirth, and puerperium codes in any field – Refer to Annex D (Excel sheet - HCQO 2018\_19 Data Collection\_Annex A-I)
- Cases that are *same day/day only admissions*

**Denominator:** Population count.

**Hypertension diagnosis codes:**

| ICD-9-CM                       | ICD-10-WHO                                                         |
|--------------------------------|--------------------------------------------------------------------|
| 4010 MALIGNANT HYPERTENSION    | I10 ESSENTIAL (PRIMARY) HYPERTENSION                               |
| 4019 HYPERTENSION NOS          | I119 HYPERTENSIVE HEART DISEASE WITHOUT (CONGESTIVE) HEART FAILURE |
| 40200 MAL HYPERTEN HRT DIS NOS | I129 HYPERTENSIVE RENAL DISEASE WITHOUT RENAL FAILURE              |
| 40210 BEN HYPERTEN HRT DIS NOS | I139 HYPERTENSIVE HEART AND RENAL DISEASE, UNSPECIFIED             |
| 40290 HYPERTENSIVE HRT DIS NOS |                                                                    |
| 40300 MAL HYP REN W/O REN FAIL |                                                                    |
| 40310 BEN HYP REN W/O REN FAIL |                                                                    |
| 40390 HYP REN NOS W/O REN FAIL |                                                                    |
| 40400 MAL HY HT/REN W/O CHF/RF |                                                                    |
| 40410 BEN HY HT/REN W/O CHF/RF |                                                                    |
| 40490 HY HT/REN NOS W/O CHF/RF |                                                                    |

**AA5) DIABETES HOSPITAL ADMISSION***(See Glossary for definitions of italicized terminology)*

**Coverage:** Population aged 15 and older (5 year age groups). All *acute care hospitals*, including public and private hospitals that provide inpatient care.

**Numerator:** All non-maternal/non-neonatal hospital *admissions* with a *principal diagnosis* code of diabetes (see Diabetes diagnosis codes below) in a specified year.

**Exclude:**

- Cases where the patient died in hospital during the admission.
- Cases resulting from a transfer from another acute care institution (*transfers-in*).
- Cases with *MDC 14* or specified pregnancy, childbirth, and puerperium codes in any field – Refer to Annex D (Excel sheet - HCQO 2018\_19 Data Collection\_Annex A-I)
- Cases that are *same day/day only admissions*

**Denominator:** Population count.

**Diabetes diagnosis codes**

| ICD-9-CM                       | ICD-10-WHO                                                                |
|--------------------------------|---------------------------------------------------------------------------|
| 25002 DMII WO CMP UNCNRDL      | E10.0 INSULIN-DEPENDENT DIABETES MELLITUS WITH COMA                       |
| 25003 DMI WO CMP UNCNRDL       | E10.1 INSULIN-DEPENDENT DIABETES MELLITUS WITH KETOACIDOSIS               |
| 25010 DMII KETO NT ST UNCNRDL  | E10.2 INSULIN-DEPENDENT DIABETES MELLITUS WITH RENAL COMPLICATIONS        |
| 25011 DMI KETO NT ST UNCNRDL   | E10.3 INSULIN-DEPENDENT DIABETES MELLITUS WITH OPHTHALMIC COMPLICATIONS   |
| 25012 DMII KETOACD UNCONTROLD  | E10.4 INSULIN-DEPENDENT DIABETES MELLITUS WITH NEUROLOGICAL COMPLICATIONS |
| 25013 DMI KETOACD UNCONTROLD   | E10.5 INSULIN-DEPENDENT DM WITH PERIPHERAL CIRCULATORY COMPLICATIONS      |
| 25020 DMII HPRSM NT ST UNCNRDL | E10.6 INSULIN-DEPENDENT DM WITH OTHER SPECIFIED COMPLICATIONS             |
| 25021 DMI HPRSM NT ST UNCNRDL  | E10.7 INSULIN-DEPENDENT DIABETES MELLITUS WITH MULTIPLE COMPLICATIONS     |
| 25022 DMII HPROMLR UNCONTROLD  | E10.8 INSULIN-DEPENDENT DIABETES MELLITUS WITH UNSPECIFIED COMPLICATIONS  |
| 25023 DMI HPROMLR UNCONTROLD   | E10.9 INSULIN-DEPENDENT DIABETES MELLITUS WITHOUT COMPLICATIONS           |
| 25030 DMII O CM NT ST UNCNRDL  | E11.0 NON-INSULIN-DEPENDENT DIABETES MELLITUS WITH COMA                   |
| 25031 DMI O CM NT ST UNCNRDL   | E11.1 NON-INSULIN-DEPENDENT DIABETES MELLITUS WITH KETOACIDOSIS           |
| 25032 DMII OTH COMA UNCONTROLD |                                                                           |
| 25033 DMI OTH COMA UNCONTROLD  |                                                                           |
| 25040 DMII RENL NT ST UNCNRDL  |                                                                           |
| 25041 DMI RENL NT ST UNCNRDL   |                                                                           |
| 25042 DMII RENAL UNCNRDL       |                                                                           |
| 25043 DMI RENAL UNCNRDL        |                                                                           |
| 25050 DMII OPHTH NT ST UNCNRDL |                                                                           |
| 25051 DMI OPHTH NT ST UNCNRDL  |                                                                           |
| 25052 DMII OPHTH UNCNRDL       |                                                                           |
| 25053 DMI OPHTH UNCNRDL        |                                                                           |
| 25060 DMII NEURO NT ST UNCNRDL |                                                                           |
| 25061 DMI NEURO NT ST UNCNRDL  |                                                                           |



|                                |                                                                            |
|--------------------------------|----------------------------------------------------------------------------|
| 25062 DMII NEURO UNCNRDL       | E11.2 NON-INSULIN-DEPENDENT DIABETES MELLITUS WITH RENAL COMPLICATIONS     |
| 25063 DMI NEURO UNCNRDL        | E11.3 NON-INSULIN-DEPENDENT DMWITH OPHTHALMIC COMPLICATIONS                |
| 25070 DMII CIRC NT ST UNCNRDL  | E11.4 NON-INSULIN-DEPENDENT DM WITH NEUROLOGICAL COMPLICATIONS             |
| 25071 DMI CIRC NT ST UNCNRDL   | E11.5 NON-INSULIN-DEPENDENT DM WITH PERIPHERAL CIRCULATORY COMPLICATIONS   |
| 25072 DMII CIRC UNCNRDL        | E11.6 NON-INSULIN-DEPENDENT DM WITH OTHER SPECIFIED COMPLICATIONS          |
| 25073 DMI CIRC UNCNRDL         | E11.7 NON-INSULIN-DEPENDENT DIABETES MELLITUS WITH MULTIPLE COMPLICATIONS  |
| 25080 DMII OTH NT ST UNCNRDL   | E11.8 NON-INSULIN-DEPENDENT DM WITH UNSPECIFIED COMPLICATIONS              |
| 25081 DMI OTH NT ST UNCNRDL    | E11.9 NON-INSULIN-DEPENDENT DIABETES MELLITUS WITHOUT COMPLICATIONS        |
| 25082 DMII OTH UNCNRDL         | E13.0 OTHER SPECIFIED DIABETES MELLITUS WITH COMA                          |
| 25083 DMI OTH UNCNRDL          | E13.1 OTHER SPECIFIED DIABETES MELLITUS WITH KETOACIDOSIS                  |
| 25090 DMII UNSPF NT ST UNCNRDL | E13.2 OTHER SPECIFIED DIABETES MELLITUS WITH RENAL COMPLICATIONS           |
| 25091 DMI UNSPF NT ST UNCNRDL  | E13.3 OTHER SPECIFIED DIABETES MELLITUS WITH OPHTHALMIC COMPLICATIONS      |
| 25092 DMII UNSPF UNCNRDL       | E13.4 OTHER SPECIFIED DIABETES MELLITUS WITH NEUROLOGICAL COMPLICATIONS    |
| 25093 DMI UNSPF UNCNRDL        | E13.5 OTHER SPECIFIED DM WITH PERIPHERAL CIRCULATORY COMPLICATIONS         |
|                                | E13.6 OTHER SPECIFIED DIABETES MELLITUS WITH OTHER SPECIFIED COMPLICATIONS |
|                                | E13.7 OTHER SPECIFIED DIABETES MELLITUS WITH MULTIPLE COMPLICATIONS        |
|                                | E13.8 OTHER SPECIFIED DIABETES MELLITUS WITH UNSPECIFIED COMPLICATIONS     |
|                                | E13.9 OTHER SPECIFIED DIABETES MELLITUS WITHOUT COMPLICATIONS              |
|                                | E14.0 UNSPECIFIED DIABETES MELLITUS WITH COMA                              |
|                                | E14.1 UNSPECIFIED DIABETES MELLITUS WITH KETOACIDOSIS                      |
|                                | E14.2 UNSPECIFIED DIABETES MELLITUS WITH RENAL COMPLICATIONS               |
|                                | E14.3 UNSPECIFIED DIABETES MELLITUS WITH OPHTHALMIC COMPLICATIONS          |
|                                | E14.4 UNSPECIFIED DIABETES MELLITUS WITH NEUROLOGICAL COMPLICATIONS        |
|                                | E14.5 UNSPECIFIED DM WITH PERIPHERAL CIRCULATORY COMPLICATIONS             |
|                                | E14.6 UNSPECIFIED DIABETES MELLITUS WITH OTHER SPECIFIED COMPLICATIONS     |
|                                | E14.7 UNSPECIFIED DIABETES MELLITUS WITH MULTIPLE COMPLICATIONS            |
|                                | E14.8 UNSPECIFIED DIABETES MELLITUS WITH UNSPECIFIED COMPLICATIONS         |
|                                | E14.9 UNSPECIFIED DIABETES MELLITUS WITHOUT COMPLICATIONS                  |
